# Supplementary material for: Implementation of the Activate injury prevention exercise programme in English schoolboy rugby union
Source: HighWire-hosted journal article supplement (doi:10.1136/bmjsem-2020-001018), 2021-05-01
Supplement: bmjsem-2020-001018supp001_data_supplement.pdf [file bmjsem-2020-001018supp001_data_supplement.pdf]

## Supplementary File 1. Survey questions and responses completed by study participants

| Question/ Statement                                                                                                                                                                                                         | RE-AIM Dimension | Responses                                                                                                                                       | Coaches  |             | Players  |             |
|-----------------------------------------------------------------------------------------------------------------------------------------------------------------------------------------------------------------------------|------------------|-------------------------------------------------------------------------------------------------------------------------------------------------|----------|-------------|----------|-------------|
|                                                                                                                                                                                                                             |                  |                                                                                                                                                 | Baseline | Post-season | Baseline | Post-season |
| What is your role?                                                                                                                                                                                                          | -                | <b>Select One:</b><br>Director of Sport<br>Head coach<br>Assistant coach<br>Team manager<br>Conditioning Coach<br>Medical practitioner<br>Other | A        |             |          |             |
| If coaching, how many years coaching experience do you have?                                                                                                                                                                | -                | <b>Select One:</b><br>Never<br>Less than 2 years<br>2-3 years<br>4-5 years<br>6 years+                                                          | A        |             |          |             |
| - What is the highest level you have coached?                                                                                                                                                                               | -                | <b>Select One:</b><br>School/club<br>Regional academy<br>County/constituent body<br>Divisional<br>Professional<br>International                 | A        |             |          |             |
| - What is the highest coaching qualification you hold?                                                                                                                                                                      | -                | <b>Select One:</b><br>RFU Level 1<br>RFU Level 2<br>RFU Level 3<br>RFU Level 4<br>Other                                                         | A        |             |          |             |
| - When was this coaching qualification attained (please tick 1 answer)?                                                                                                                                                     | -                | <b>Select One:</b><br>Less than 2 years<br>2-3 years<br>4-5 years<br>More than 5 years ago                                                      | A        |             |          |             |
| - What age group do you coach/play in?                                                                                                                                                                                      | -                | <b>Select One:</b><br>Under-12<br>-<br>Under-19<br>Various                                                                                      | A        |             | A        |             |
| When was the last time you completed an official RFU course?                                                                                                                                                                | -                | <b>Select One:</b><br>Less than 2 years ago<br>2-3 years<br>4-5 years<br>6+ years ago                                                           | A        |             |          |             |
| Have you previously played competitive rugby?                                                                                                                                                                               | -                | <b>Select One:</b><br>No<br>Yes                                                                                                                 | A        |             |          |             |
| - If yes, what is the highest level you have played?                                                                                                                                                                        | -                | <b>Select One:</b><br>School<br>Age group community<br>Junior academy<br>University<br>Adult community<br>Professional<br>International         | A        |             |          |             |
| Do you have a current medical or first aid qualification?                                                                                                                                                                   | -                |                                                                                                                                                 | A        |             |          |             |
| Have you ever used a specific programme to reduce your/players injury risk?                                                                                                                                                 | -                | <b>Select One:</b>                                                                                                                              | A        |             | A        |             |
| In the past 12 months, have you experienced a rugby injury that caused you to miss a game or training session?                                                                                                              | -                | No<br>Yes                                                                                                                                       |          |             | A        |             |
| - If yes, did it cause you to miss school or work for at least 1 day?                                                                                                                                                       | -                |                                                                                                                                                 |          |             | A        |             |
| In your opinion, <b>how serious</b> are the following types of Rugby injuries?<br>- Ankle sprain<br>- Knee ligament sprain<br>- Muscle strain<br>- Concussion<br>- Bone/fracture<br>- Bruise/contusion<br>- Shoulder injury | -                | <b>7-point Likert Scale:</b><br>1. Not serious<br>-<br>7. Very Serious                                                                          |          |             |          |             |
| Rugby injuries can <b>shorten a player's career</b>                                                                                                                                                                         | -                |                                                                                                                                                 | B        |             |          |             |
| Rugby injuries can cause <b>physical problems later in life</b>                                                                                                                                                             | -                |                                                                                                                                                 | B        |             |          |             |
| Rugby injuries have a <b>negative impact on team performance</b>                                                                                                                                                            | -                |                                                                                                                                                 | B        |             |          |             |
| Rugby injuries have a <b>negative impact on a player's quality of life</b>                                                                                                                                                  | -                |                                                                                                                                                 | B        |             |          |             |
| Rugby players are at <b>high risk of suffering an injury</b>                                                                                                                                                                | -                |                                                                                                                                                 | B        |             | B        |             |
| I expect a player I coach to <b>sustain a Rugby injury</b> sometime during the next                                                                                                                                         | -                |                                                                                                                                                 | B        |             | B        |             |

|                                                                                                                                                                                                                               |            |                                                                                  |   |   |   |
|-------------------------------------------------------------------------------------------------------------------------------------------------------------------------------------------------------------------------------|------------|----------------------------------------------------------------------------------|---|---|---|
| season                                                                                                                                                                                                                        |            |                                                                                  |   |   |   |
| It is <b>possible to prevent</b> some Rugby injuries                                                                                                                                                                          | -          |                                                                                  | C |   | C |
| Exercises which have been <b>shown to prevent</b> injuries should be performed by Rugby players                                                                                                                               | A, M       |                                                                                  | C |   | C |
| Exercises to prevent injuries should be <b>varied and progressed</b> over time                                                                                                                                                | A, I, M    |                                                                                  | C |   |   |
| Exercises which have been <b>shown to prevent</b> injuries should be incorporated into Schools Rugby training                                                                                                                 | M          |                                                                                  | C |   |   |
| Completing a Rugby specific warm-up programme prior to every game and training session will <b>reduce the risk</b> of players sustaining an injury                                                                            | E, A, I    |                                                                                  | C |   | C |
| Completing a Rugby specific warm-up programme prior to every game and training session <b>will improve</b> physical characteristics such as balance, agility and strength                                                     | E, A, I    |                                                                                  | C |   |   |
| <b>Balance</b> exercises can prevent Rugby injuries                                                                                                                                                                           | E, A, I    |                                                                                  |   |   |   |
| <b>Controlled jumping/landing</b> exercises can prevent Rugby injuries                                                                                                                                                        | E, A, I    |                                                                                  |   |   |   |
| A <b>warm-up jog/run</b> can prevent Rugby injuries                                                                                                                                                                           | E, A, I    |                                                                                  |   |   |   |
| <b>Cutting exercises</b> can prevent Rugby injuries                                                                                                                                                                           | E, A, I    |                                                                                  |   |   |   |
| <b>Cool-down jog/run</b> can prevent Rugby injuries                                                                                                                                                                           | E, A, I    |                                                                                  |   |   |   |
| Resisted shoulder exercises can prevent <b>shoulder injuries</b> in Rugby                                                                                                                                                     | E, A, I    |                                                                                  |   |   |   |
| Neck muscle strengthening can prevent <b>concussion</b> in Rugby                                                                                                                                                              | E, A, I    |                                                                                  |   |   |   |
| I would like my team to complete a Rugby specific warm-up programme prior to every game and training session next season                                                                                                      | A, I, M    |                                                                                  |   |   |   |
| <b>Who is responsible</b> for Rugby injury prevention?<br>- Head coach<br>- Assistant coach<br>- Team manager<br>- Strength and conditioning/ fitness coach<br>- School medical practitioner<br>- Player<br>- Parent/guardian | A, I, M    | Tick all that apply                                                              | C |   | C |
| Had you <b>heard of 'Activate'</b> before taking part in this survey?                                                                                                                                                         | R          | Select One:<br>Yes<br>No<br>Unsure                                               | D |   | D |
| - If yes, where did you heard about it?<br>- RFU Website<br>- Community Rugby Coaches<br>- Peers<br>- Social media                                                                                                            | R          | Tick all that apply                                                              | D |   | D |
| Have you <b>ever used</b> 'Activate'?                                                                                                                                                                                         | R, A, M    | Select One:<br>Yes<br>No<br>Unsure                                               | D |   | D |
| Does your team <b>currently use</b> 'Activate'?                                                                                                                                                                               | R, A       | Select One:<br>Yes<br>No<br>Unsure                                               | D | E | D |
| Does 'Activate' need to be <b>improved for use</b> in your team?                                                                                                                                                              | A, I, M    | Select One:<br>Yes<br>No<br>Unsure                                               |   | E |   |
| Should your school <b>develop its own version</b> of 'Activate'?                                                                                                                                                              | A, I, M    | Select One:<br>Yes<br>No<br>Unsure                                               |   | E |   |
| 'Activate' can <b>prevent</b> Rugby injuries in your team                                                                                                                                                                     | E, A       | 7-point Likert Scale:<br>1. Strongly Agree<br>-<br>7. Strongly Disagree          |   | E |   |
| 'Activate' is <b>Rugby specific</b>                                                                                                                                                                                           | A, I, M    | 7-point Likert Scale:<br>1. Strongly Agree<br>-<br>7. Strongly Disagree          |   | E | E |
| 'Activate' is <b>too long</b>                                                                                                                                                                                                 | A, I, M    | 7-point Likert Scale:<br>1. Strongly Agree<br>-<br>7. Strongly Disagree          |   | E | E |
| 'Activate' contains adequate <b>variation and progression</b> for our team                                                                                                                                                    | A, I, M    | 7-point Likert Scale:<br>1. Strongly Agree<br>-<br>7. Strongly Disagree          |   | E |   |
| 'Activate' could be <b>maintained</b> over multiple seasons by our team                                                                                                                                                       | A, I, M    | 7-point Likert Scale:<br>1. Strongly Agree<br>-<br>7. Strongly Disagree          |   | E |   |
| 'Activate' was <b>fun to do</b>                                                                                                                                                                                               | A, I, M    | 7-point Likert Scale:<br>1. Strongly Agree<br>-<br>7. Strongly Disagree          |   |   | E |
| In your opinion, what happened to your players' <b>overall risk of injury</b> as they completed 'Activate' in training or prior to match play playing this season?                                                            | E, A, I, M | 7-point Likert Scale:<br>1. Extremely Increase<br>-<br>7. Extremely Decreased    |   | E | E |
| How confident are you that <b>you understand 'Activate'</b> well enough to use it with the School team(s) you are coaching for the upcoming season?                                                                           | -          | 7-point Likert Scale:<br>1. Extremely Confident<br>-<br>7. Extremely Unconfident |   |   |   |
| How confident are you that <b>you have the ability to use 'Activate'</b> with the School team(s) you are coaching for the upcoming season?                                                                                    | -          | 7-point Likert Scale:<br>1. Extremely Confident<br>-<br>7. Extremely Unconfident |   |   |   |
| What <b>resources were available</b> to help you complete 'Activate' with your team at every game and training session during the upcoming season?                                                                            | -          | Free Text Box                                                                    |   |   |   |
| What <b>barriers prevented or impeded you</b> from the completing 'Activate' with your team at every game and training session during the upcoming season?                                                                    | -          | Free Text Box                                                                    |   |   |   |
| If there was <b>limited space</b> at your practice or game venue, how confident were you that your team could complete 'Activate'?                                                                                            | -          | 7-point Likert Scale:<br>1. Extremely Confident<br>-<br>7. Extremely Unconfident |   |   |   |
| If the players on your team <b>did not enjoy</b> performing 'Activate', how confident were you that you could still have them complete it at every game and training session?                                                 | -          | 7-point Likert Scale:<br>1. Extremely Confident<br>-<br>7. Extremely Unconfident |   |   |   |
| If you were to start the season by completing 'Activate' with your team at every game and training session, how confident are you that you could continue to do                                                               | -          | 7-point Likert Scale:<br>1. Extremely Confident<br>-<br>7. Extremely Unconfident |   |   |   |

|                                                                                                                                                               |         |                                                                                                  |  |   |   |
|---------------------------------------------------------------------------------------------------------------------------------------------------------------|---------|--------------------------------------------------------------------------------------------------|--|---|---|
| so for the <i>entire season</i> ?                                                                                                                             |         |                                                                                                  |  |   |   |
| If you <i>missed completing the programme</i> at a game or training, how confident were you that you could start completing it again the next session?        | -       |                                                                                                  |  |   |   |
| On average, how <i>many times a week</i> did your team complete 'Activate' <i>during this season</i> ?                                                        | A, I    | <b>Select One:</b><br>Never<br><1 x per week<br>1 x per week<br>2 x per week<br>3 x per week     |  | E | E |
| On average, <i>how long did it take</i> your team to complete 'Activate' <i>during training</i> ?                                                             | A, I    | <b>Select One:</b><br>We didn't<br>5-10 minutes<br>10-15 minutes<br>15-20 minutes<br>>20 minutes |  | E |   |
| On average, <i>how long did it take</i> your team to complete 'Activate' <i>before matches</i> ?                                                              | A, I    |                                                                                                  |  | E |   |
| What are some of the things you <i>did like</i> about doing 'Activate' with your team before training or matches?                                             | A, I, M | <b>Tick all that apply:</b><br>Various prefilled responses                                       |  | E | E |
| What were some of the things you <i>did not</i> like about doing 'Activate' with your team before training or matches ( <i>tick as many as appropriate</i> ). | A, I, M |                                                                                                  |  | E | E |
| What <i>changes would you recommend</i> to 'Activate' in terms of content or delivery structure                                                               | A, I, M |                                                                                                  |  | E |   |
| Do you intend to make <i>injury prevention a priority</i> for your team in the upcoming season?                                                               | -       | <b>7-point Likert Scale:</b><br>1. Extremely Likely<br>-<br>7. Extremely Unlikely                |  |   |   |
| Do you <i>intend to complete</i> 'Activate' with your team at every game and training session in the upcoming season?                                         | A, I, M |                                                                                                  |  | E | E |
| Next season, do you have concrete plans on how to <i>teach</i> 'Activate' to the players on your School team?                                                 | -       | <b>7-point Likert Scale:</b><br>1. Strongly Agree<br>-<br>7. Strongly Disagree                   |  |   |   |
| Next season, do you have concrete plans on <i>when</i> to have your team complete 'Activate'?                                                                 | -       |                                                                                                  |  |   |   |
| Next season, do you have concrete plans on how to <i>deal with challenges</i> in order to stick to your intentions of completing 'Activate'?                  | -       |                                                                                                  |  |   |   |
| Next season, do you have concrete plans on how to <i>encourage your team</i> to perform 'Activate' to the best of their ability?                              | -       |                                                                                                  |  |   |   |

**Abbreviation Key:**

- R = Reach
- E = Effectiveness
- A = Adoption
- I = Implementation
- M = Maintenance

**Colour Key:**

- Green signifies questions asked for this present study, labelled by section...
  - A = demographic
  - B = perceptions towards injury risk in rugby
  - C = perceptions towards injury prevention in rugby
  - D = baseline awareness and use of Activate
  - E = post-season use and perceptions of Activate
- Amber signifies questions asked for a sub-study, which were not included or analysed as part of this study.
